# Supplementary material for: Expanded Potential of the Polyamine Analogue SBP-101 (Diethyl Dihydroxyhomospermine) as a Modulator of Polyamine Metabolism and Cancer Therapeutic
Source: MDPI journal article supplement (doi:10.3390/ijms23126798), 2022-06-18
Supplement: s1 [file s1]

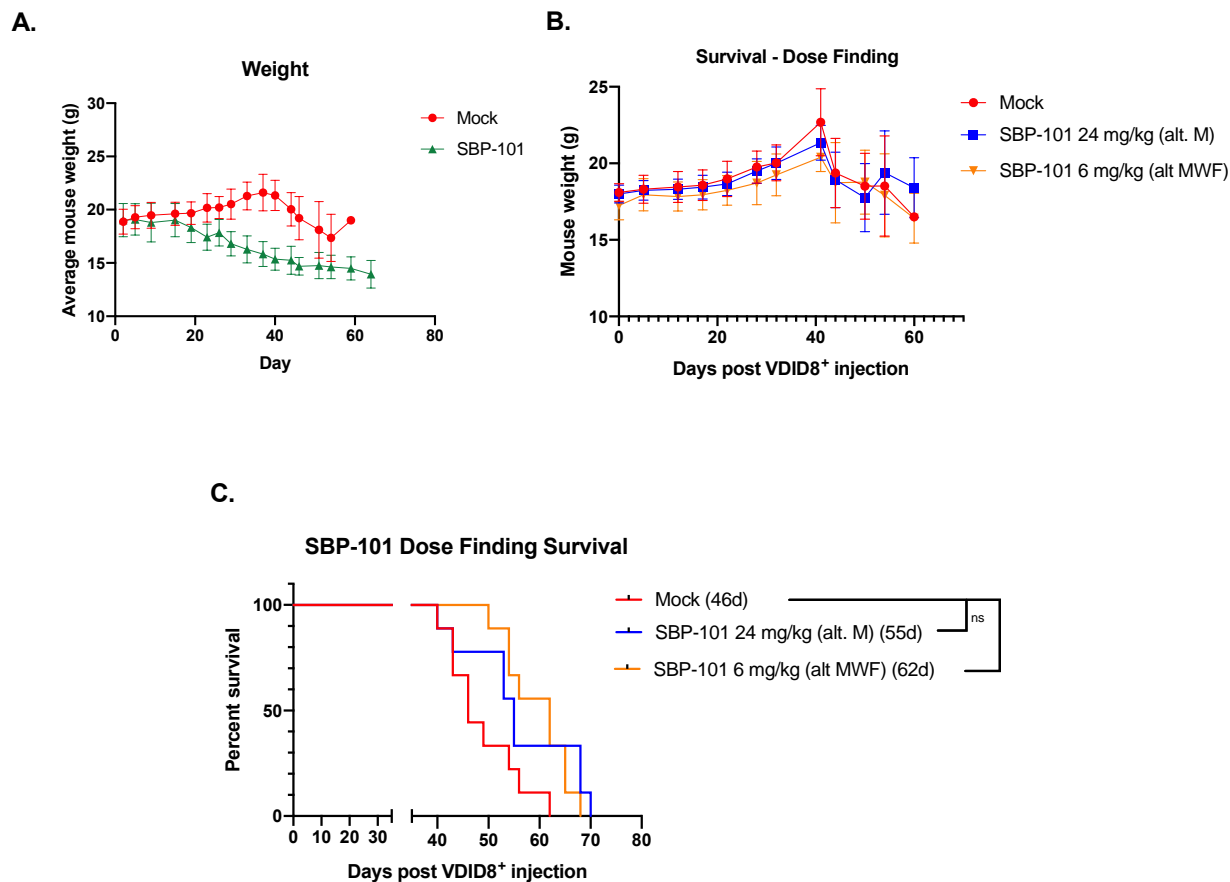

**Supplementary Figure S1. Murine response to varying doses of SBP-101.** Mice treated with 24 mg/kg SBP-101 3x per week on alternating weeks began to show weight loss around 22 days. SBP-101 treatment was stopped after 3 cycles (day 35 post VDID8<sup>+</sup> injection) and weight subsequently stabilized (**A**). Mice treated with either 24 mg/kg SBP-101 once per alternating week or 6 mg/kg thrice per alternating week did not exhibit any observable weight loss (**B**). The lower dose (6 mg/kg) of SBP-101 produced a median survival of 62 days ( $p = 0.0067$ ), a similar survival benefit to that of the original 24 mg/kg (**C**).

**Supplementary Table S1. SBP-101 deposits in the kidney and liver of treated mice.**

Kidneys and livers (from five control mice and five mice treated with 24 mg/kg three times per alternating week) were removed during necropsy and homogenized. The level of SBP-101, putrescine (PUT), spermidine (SPD), and spermine (SPM) was determined in the homogenized tissue samples by HPLC. The average content of each group is listed (all measured in nmol/mg protein). SBP-101 accumulated in the both the kidneys and the liver of treated mice, though the levels of SBP-101 were approximately 13-fold higher in the kidneys. SBP-101-treated mice have lower spermidine content in both the liver and kidney when compared to control mice.

| Organ  | Treatment | SBP-101           | PUT               | SPD               | SPM               |
|--------|-----------|-------------------|-------------------|-------------------|-------------------|
|        |           | (nmol/mg protein) | (nmol/mg protein) | (nmol/mg protein) | (nmol/mg protein) |
| Kidney | Control   | 0                 | 2.87              | 19.33             | 17.73             |
| Kidney | SBP-101   | 10.98             | 3.15              | 11.94             | 14.37             |
| Liver  | Control   | 0                 | 3.59              | 69.75             | 23.94             |
| Liver  | SBP-101   | 1.01              | 2.13              | 26.97             | 21.75             |
